# Supplementary material
Source: ML conference proceedings conference paper supplement (https://www.ecva.net/papers/eccv_2022/papers_ECCV/html/136730232_ECCV_2022_paper.php)

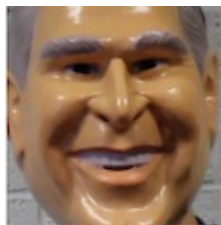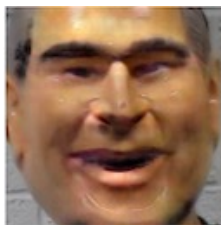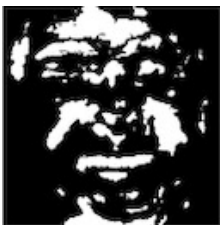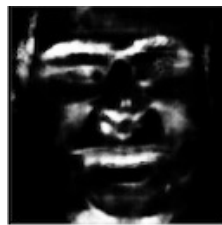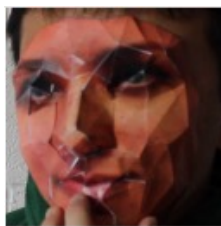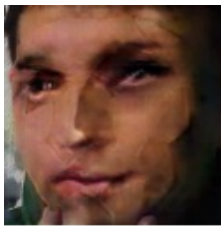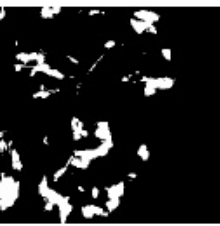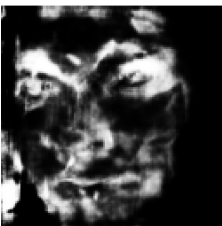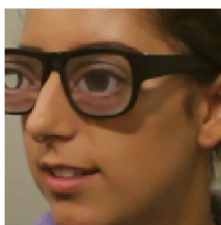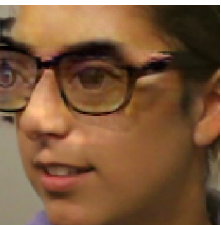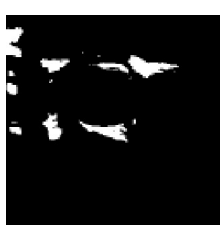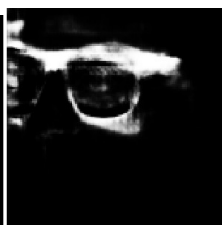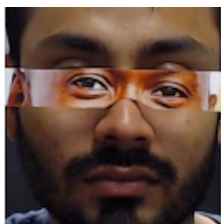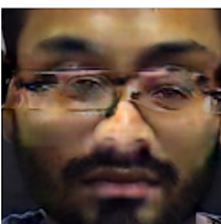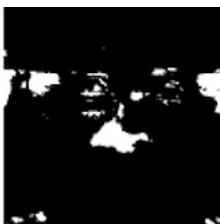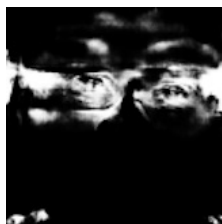

Supplement: Supplementary file 1 [file 136730232-supp.zip]

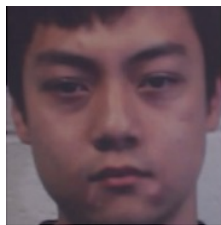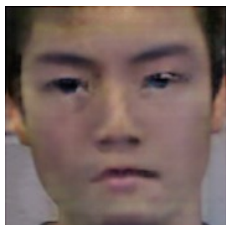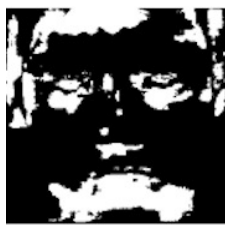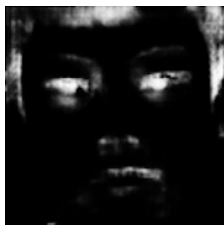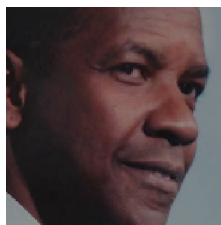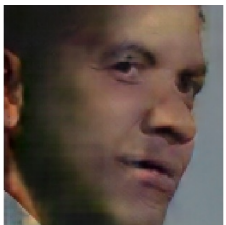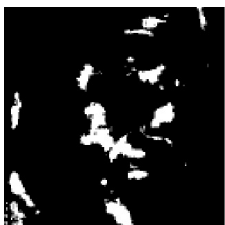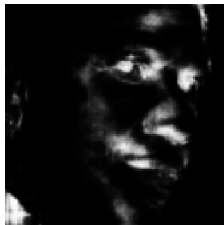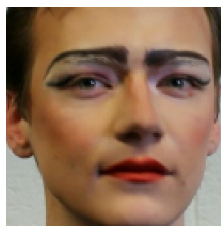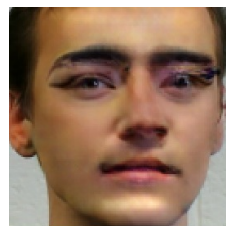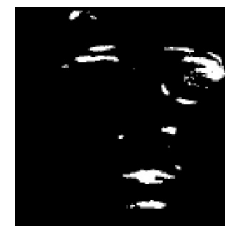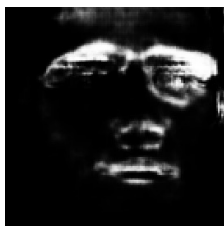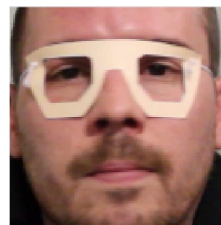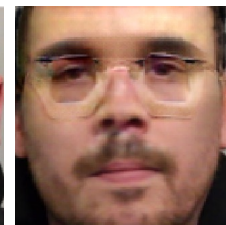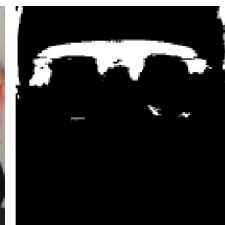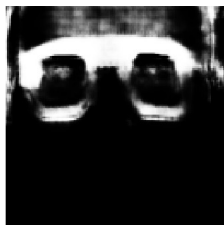

Supplement: Supplementary file 2 [file 136730232-supp.zip]

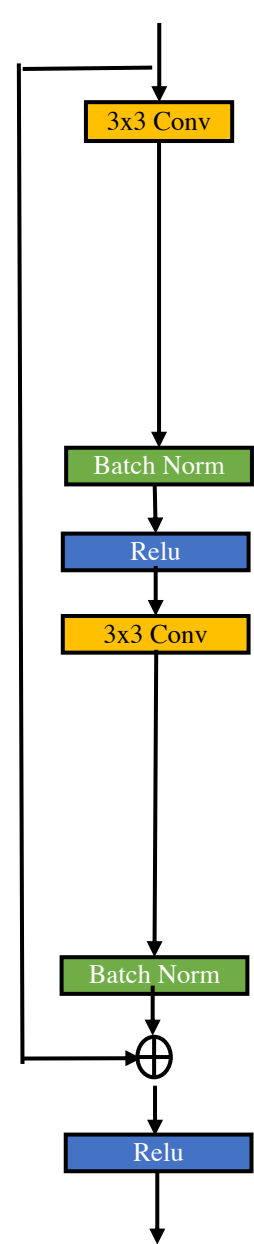

(a)

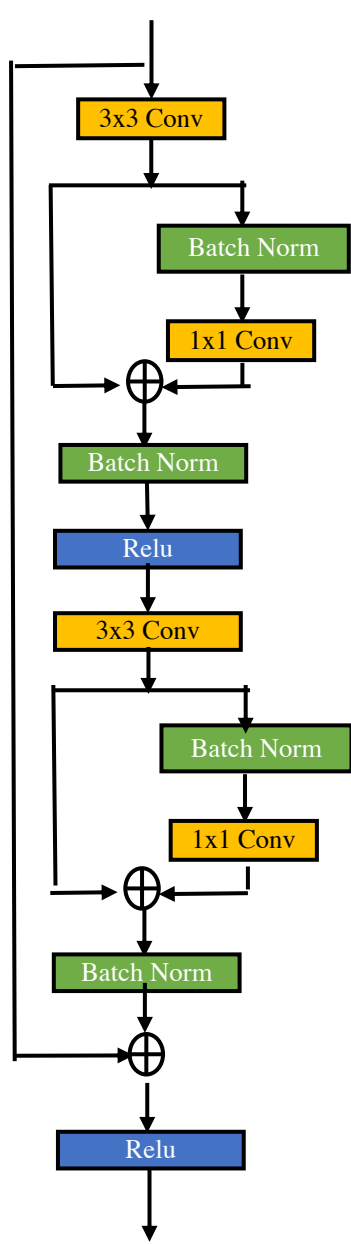

(b)

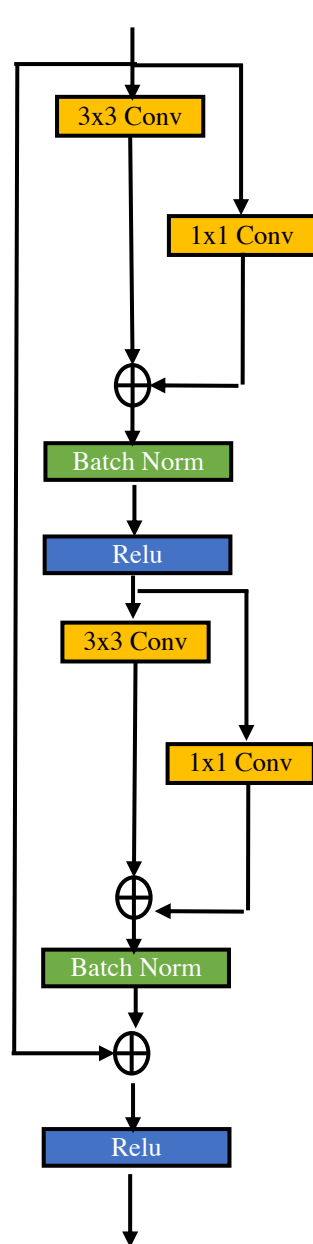

(c)

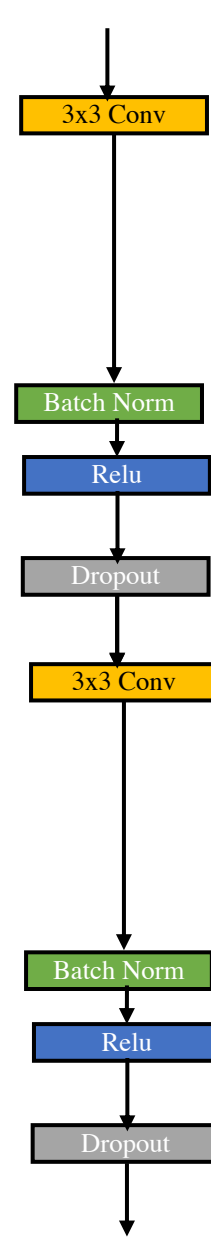

(d)

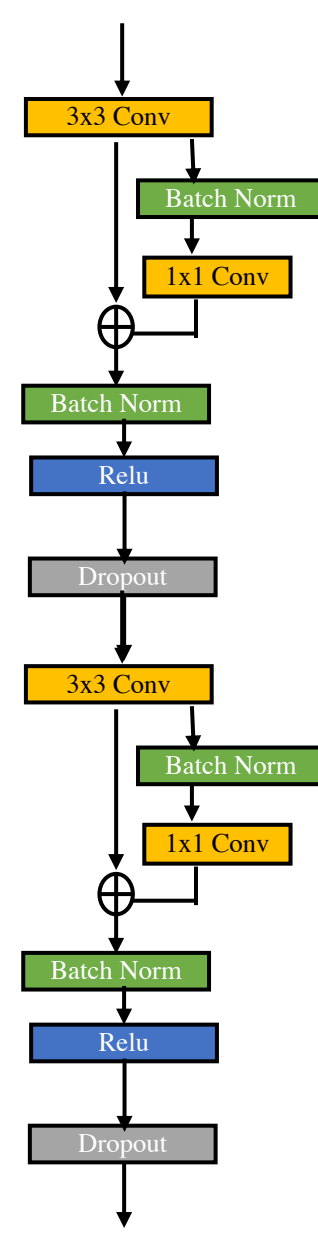

(e)

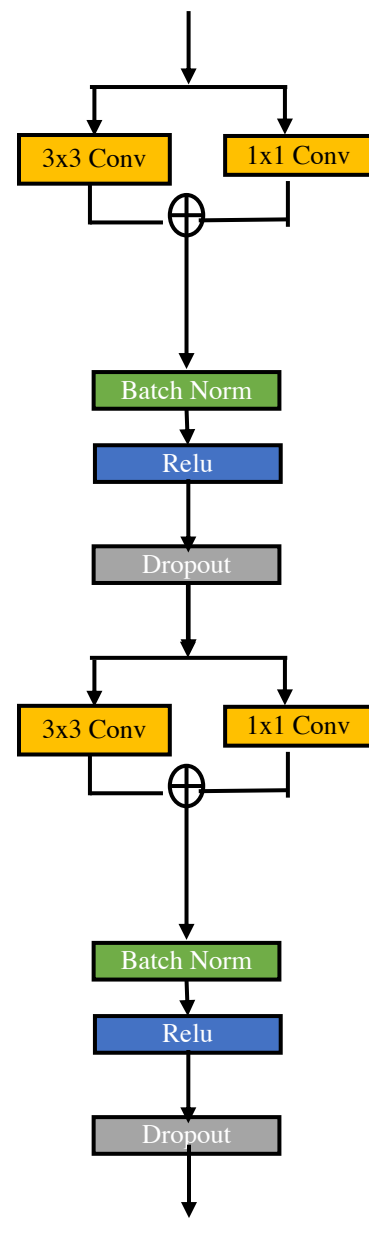

(f)

Supplement: Supplementary file 3 [file 136730232-supp.zip]

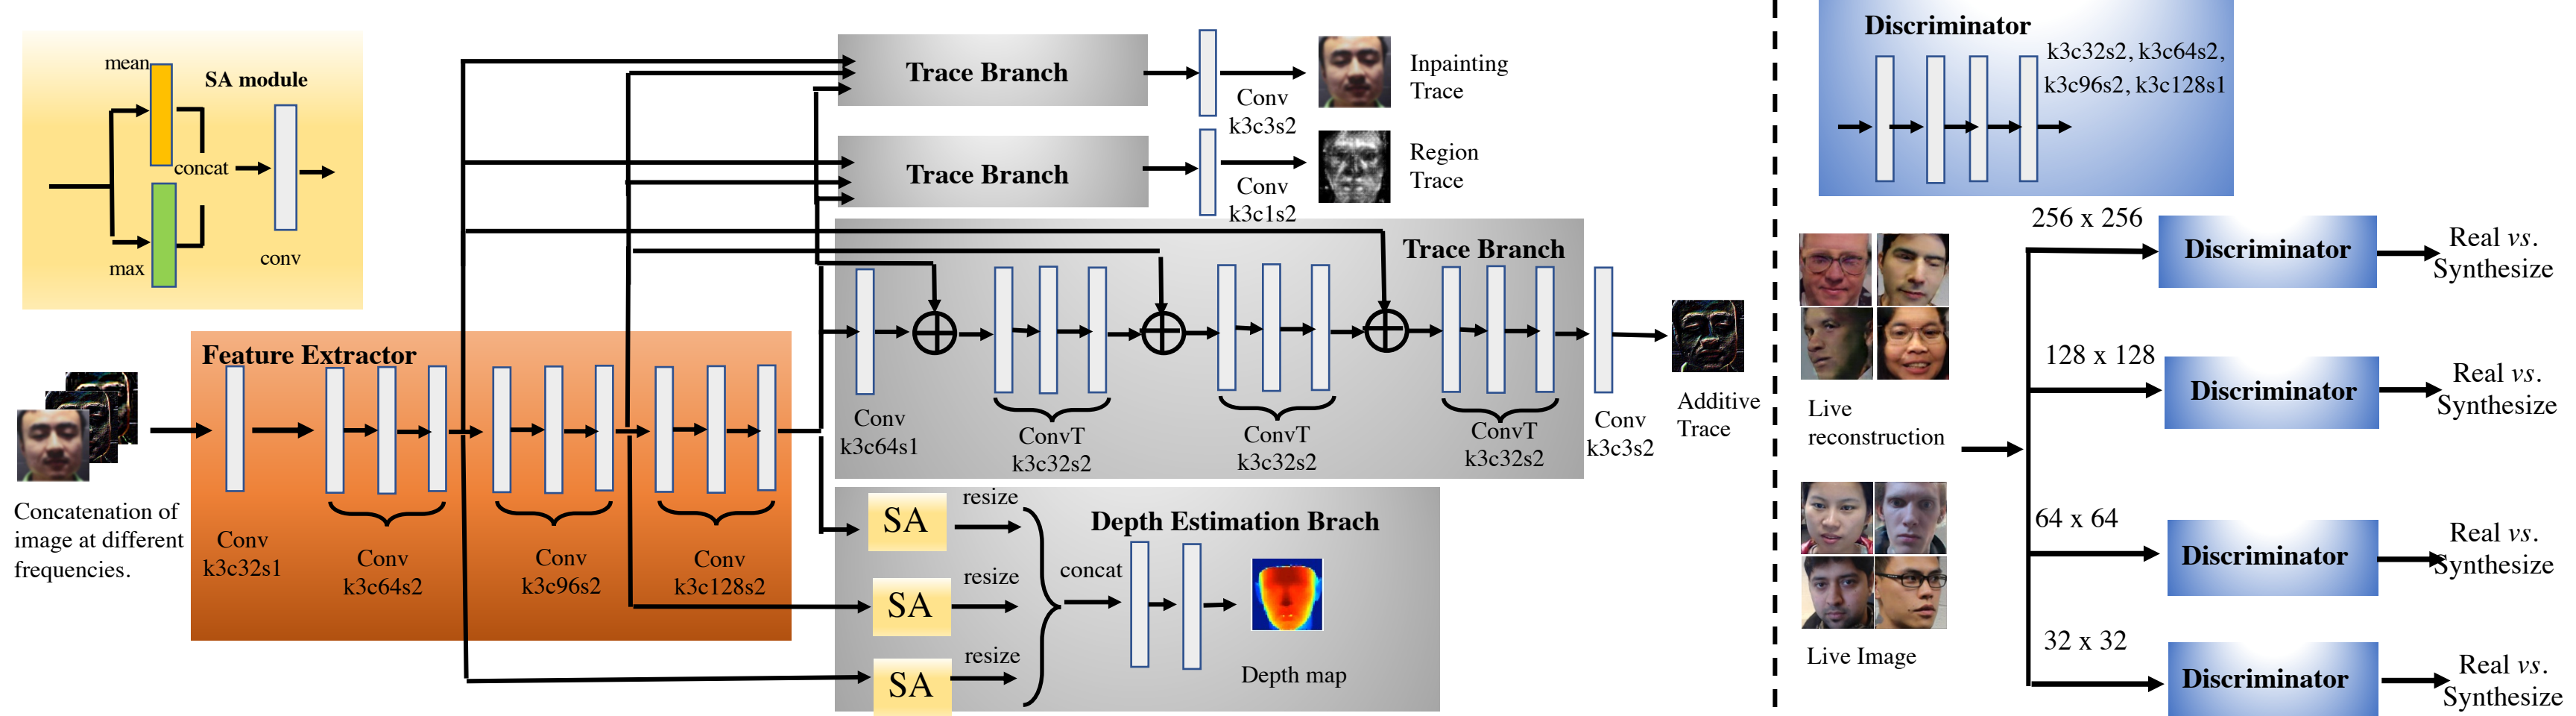

Supplement: Supplementary file 4 [file 136730232-supp.zip]

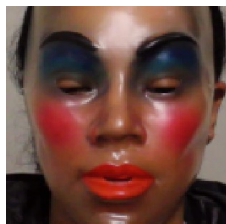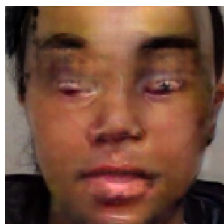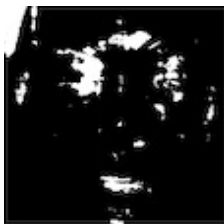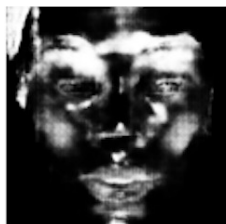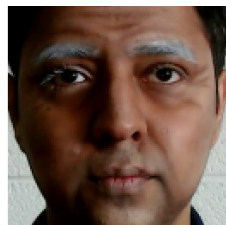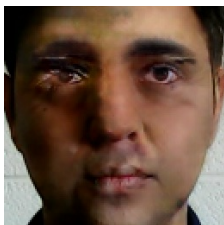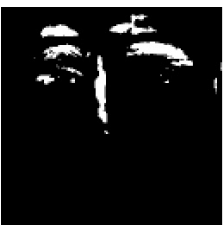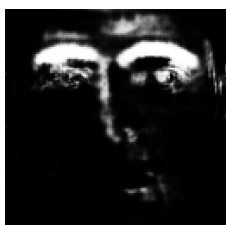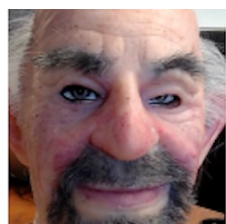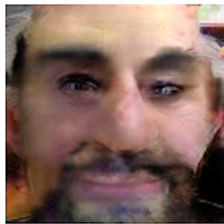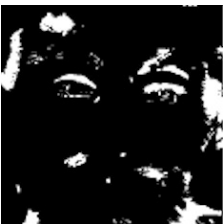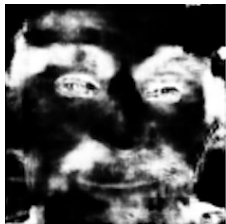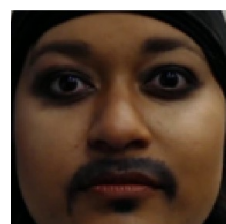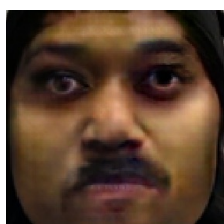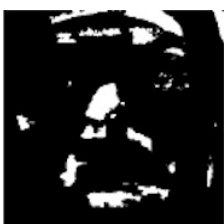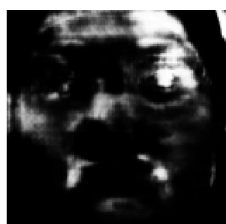

Supplement: Supplementary file 5 [file 136730232-supp.zip]

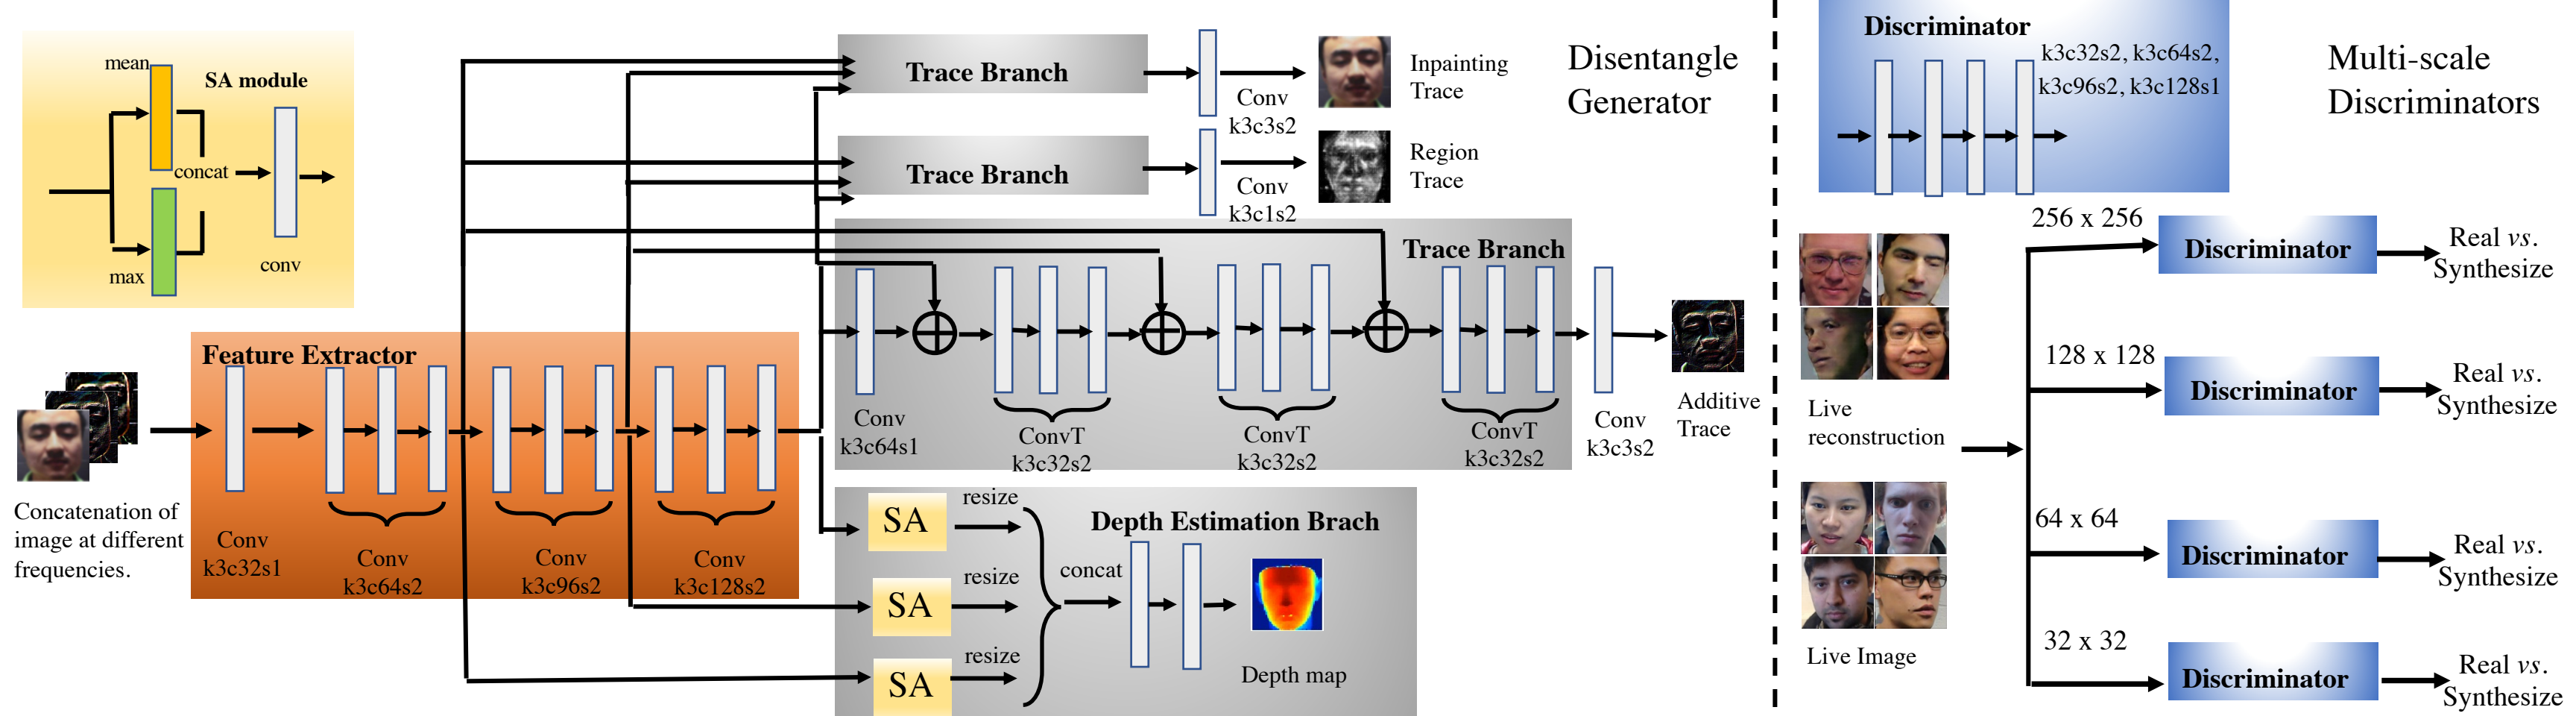

Supplement: Supplementary file 8 [file 136730232-supp.zip]

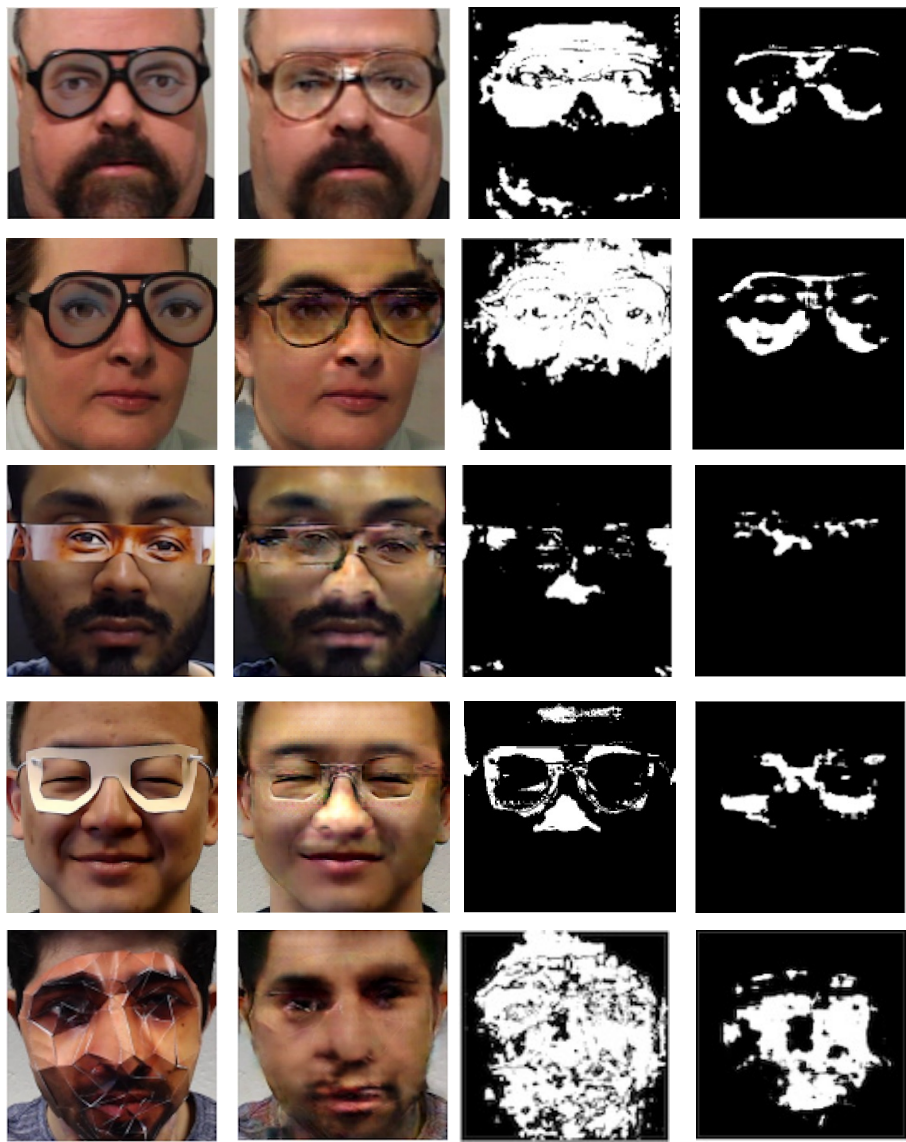

(a)

(b)

(c)

(d)

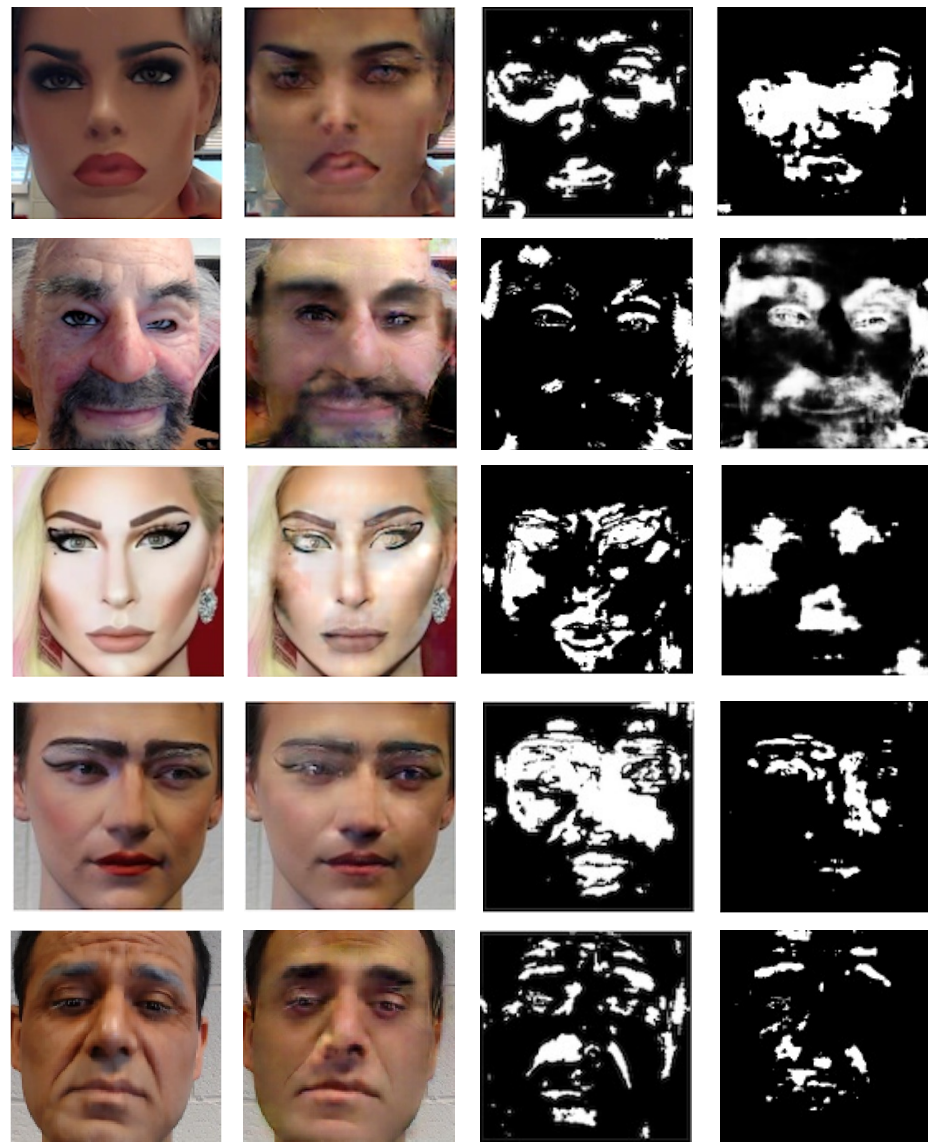

(a)

(b)

(c)

(d)

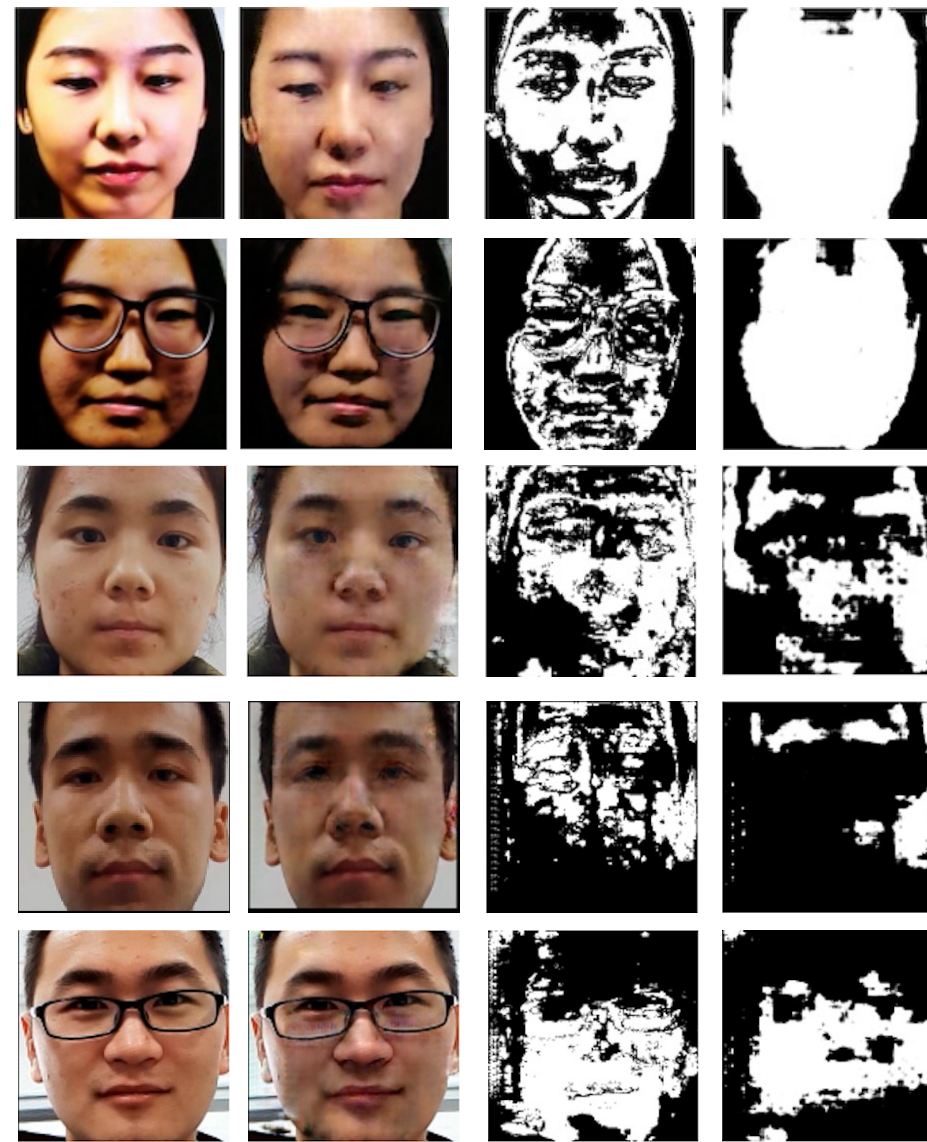

(a)

(b)

(c)

(d)

Supplement: Supplementary file 10 [file 136730232-supp.zip]

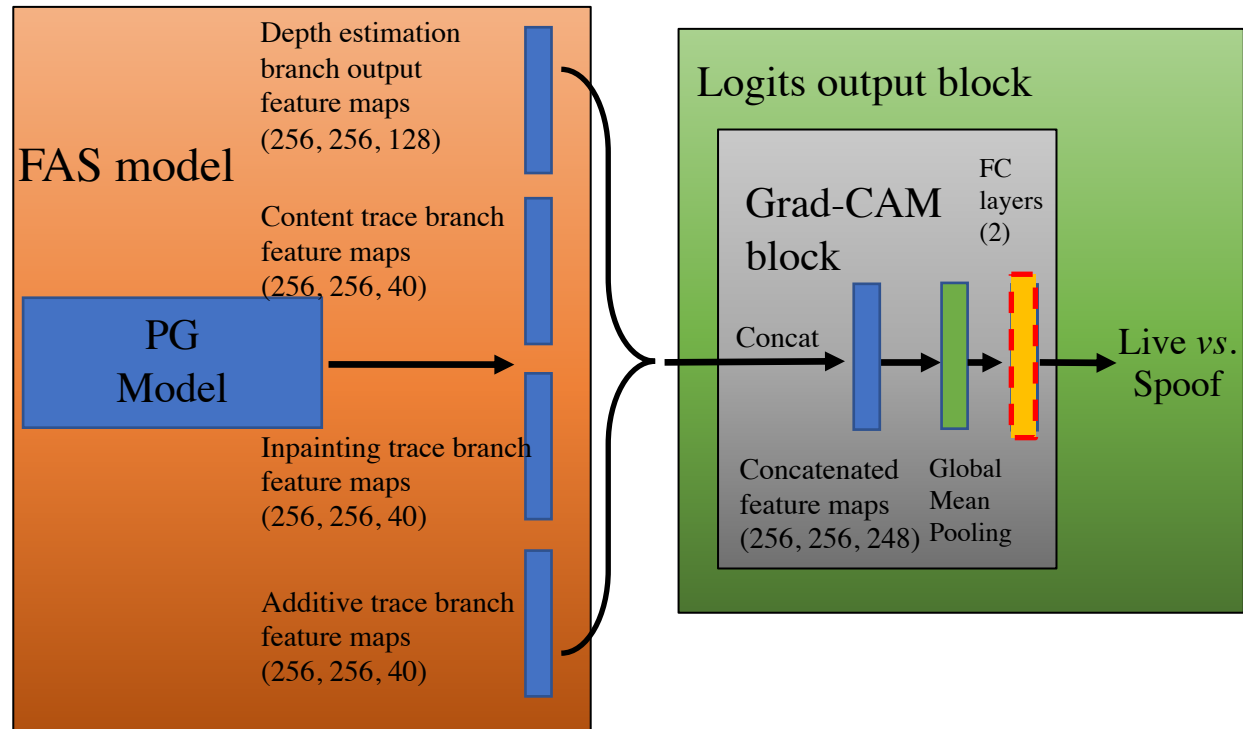

  Trainable

(a)

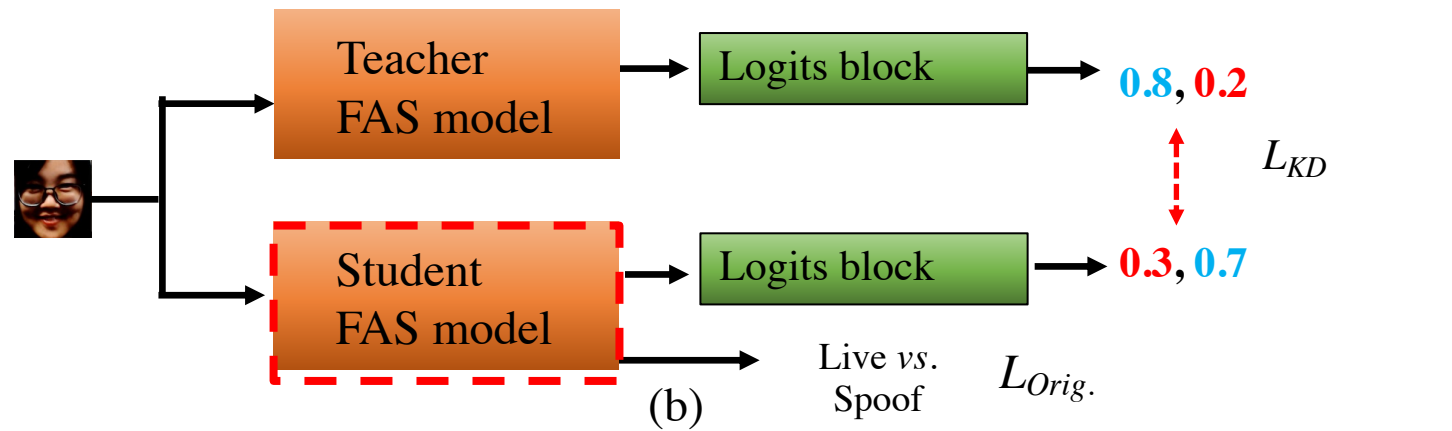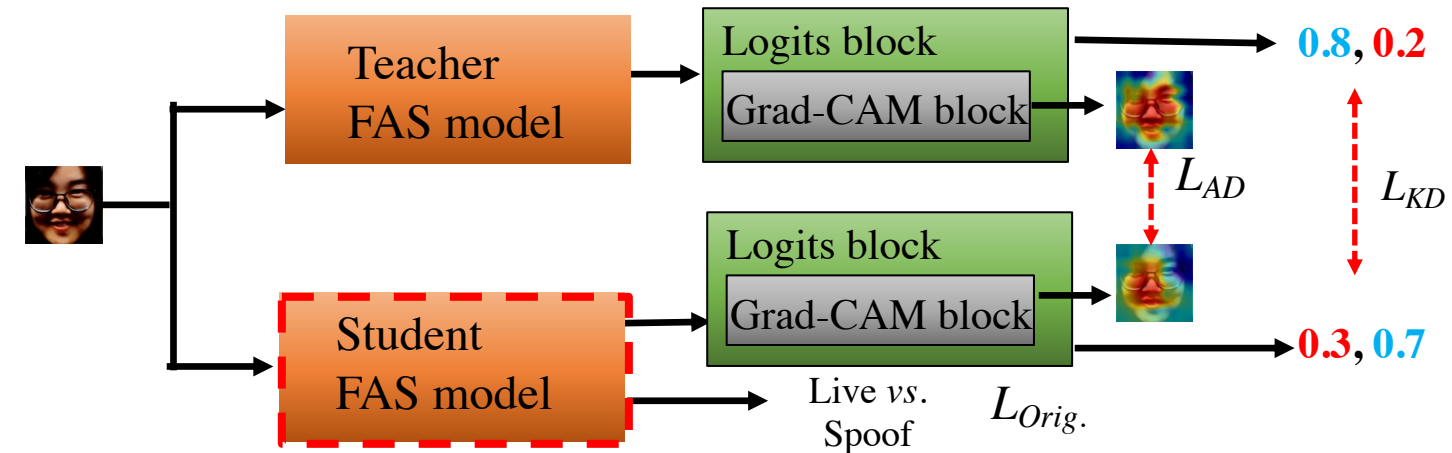

Supplement: Supplementary file 11 [file 136730232-supp.zip]
